# Supplementary material
Source: MDPI journal article supplement (https://www.mdpi.com/2071-1050/9/2/182)
Supplement: s1 [file s1]

## Supplementary Materials 2: The Role of Sustainability Resources of Large Greenhouse Gas Emitters: The Case of Corporations in Alberta, Canada

Marwa Hannouf and Getachew Assefa

The Table S2 below presents the 16 corporations responsible for the 23 reporting companies including 44 facilities emitting 86% of total GHG reported by facilities (emitting >100,000 tonnes CO<sub>2</sub>e) under SGER in Alberta in 2011.

**Table S2.** Grouping the 23 reporting companies with their associated facilities (under SGER), responsible for 86% of total GHG reported by facilities with emissions above the threshold in Alberta under SGER in 2011, into parent corporations.

| Corporation (Parent Company)     | Reporting Company <sup>a</sup>              | Facilities Related to the Reporting Company <sup>a</sup>                                                                                                                                                | Sector <sup>a</sup>                                              | Total Emissions (Tonnes CO <sub>2</sub> e) Reported by Facilities <sup>b</sup> |
|----------------------------------|---------------------------------------------|---------------------------------------------------------------------------------------------------------------------------------------------------------------------------------------------------------|------------------------------------------------------------------|--------------------------------------------------------------------------------|
| Syncrude Canada Ltd.             | Syncrude Canada Ltd.                        | 1- Mildred Lake and Aurora North Plant Sites                                                                                                                                                            | Oil Sands Mining and Upgrading                                   | 12,860,275                                                                     |
| TransAlta corporation            | TransAlta Generation Partnership            | 1- Sundance Thermal Electric Power Generating Plant<br>2- Keephills Thermal Electric Power Generating Plant<br>3- Fort Saskatchewan Thermal Electric(Cogeneration) Power Plant<br>4- Highvale Coal Mine | Electric Power Generation                                        | 20,004,996                                                                     |
| Capital Power corporation        | Capital Power Generation Services Inc.      | 1- Genesee Thermal Generating Station                                                                                                                                                                   | Electric Power Generation                                        | 9,387,151                                                                      |
| Suncor Energy Inc. Corporation   | Suncor Energy Oil Sands Limited Partnership | 1- Firebag<br>2- Mackay River In-Situ Oil Sands Plant<br>3- Suncor Energy Inc. Oil Sands                                                                                                                | Oil Sands Mining and Upgrading—Oil Sands in situ extraction      | 10,607,060                                                                     |
|                                  | Suncor Energy Products Partnership          | 1- Edmonton Refinery                                                                                                                                                                                    | Petroleum and Coal Products                                      | 1,306,418                                                                      |
| ATCO Group Corporation           | Alberta Power (2000) Ltd.                   | 1- Sheerness Generating Station<br>2- Battle River Generating Station                                                                                                                                   | Electric Power Generation                                        | 10,724,016                                                                     |
|                                  | ATCO Power Canada Ltd.                      | 1- Muskeg River Cogeneration Plant<br>2- Rainbow Lake Cogeneration Power Plant (Units 4–5)                                                                                                              | Oil Sands Mining and Upgrading                                   | 1,500,662                                                                      |
| Imperial Oil Limited Corporation | Imperial Oil Resources                      | 1- Cold Lake<br>2- Quirk Creek Gas Plant                                                                                                                                                                | Oil Sands in situ Extraction—Conventional Oil and Gas Extraction | 4,720,385                                                                      |
|                                  | Imperial Oil                                | 1- Strathcona Refinery                                                                                                                                                                                  | Petroleum and Coal Products                                      | 1,479,143                                                                      |
| Nexen                            | Nexen Inc.                                  | 1- Long Lake Project<br>2- Balzac Power Station                                                                                                                                                         | Oil Sands in Situ Extraction—Electric Power Generation           | 3,387,916                                                                      |

Table S2. Cont.

| Corporation<br>(Parent Company)       | Reporting Company <sup>a</sup>                         | Facilities Related to the Reporting Company <sup>a</sup>                                                                                                      | Sector <sup>a</sup>                                                  | Total Emissions (Tonnes CO <sub>2e</sub> )<br>Reported by Facilities <sup>b</sup> |
|---------------------------------------|--------------------------------------------------------|---------------------------------------------------------------------------------------------------------------------------------------------------------------|----------------------------------------------------------------------|-----------------------------------------------------------------------------------|
| Royal Dutch<br>Shell Plc              | Shell Canada Energy Limited                            | 1- Scotford Upgrader and Upgrader Cogeneration                                                                                                                | Oil Sands Mining and Upgrading                                       | 2,934,793                                                                         |
|                                       | Shell Canada Products                                  | 1- Shell Scotford Refinery                                                                                                                                    | Petroleum and Coal Products                                          | 1,103,221                                                                         |
|                                       | Shell Canada Energy                                    | 1- Shell Albian Sands Jackpine Mine<br>2- Shell Albian Sands Muskeg River Mine                                                                                | Oil Sands Mining and Upgrading                                       | 1,677,465                                                                         |
|                                       | Shell Canada Limited                                   | 1- Caroline Complex<br>2- Watertone Complex<br>3- Peace River Complex 5-21<br>4- Jumping Pound Complex<br>5- Shell Burnt Timber Gas Plant<br>6- Orion Complex | Conventional Oil and Gas Extraction—<br>Oil Sands In Situ Extraction | 1,859,662                                                                         |
|                                       |                                                        | 1- Wolf Lake and Primrose Plant<br>2- Horizon Oil Sands Processing Plant and Mine                                                                             | Oil Sands in Situ Extraction—Oil Sands<br>Mining and Upgrading       | 4,624,069                                                                         |
| Canadian Natural<br>Resources         | Canadian Natural<br>Resources Limited                  | 1- NOVA Chemicals Corporation (Joffre)                                                                                                                        | Chemical Manufacturing                                               | 2,892,741                                                                         |
| Nova Chemicals                        | NOVA Chemicals Corporation                             | 1- Foster Creek SAGD Bitumen Battery (with Cogen)<br>2- Christina Lake SAGD Bitumen Battery                                                                   | Oil Sands In Situ Extraction                                         | 2,498,596                                                                         |
| Cenovus Energy                        | Cenovus FCCL Ltd., as operator<br>for FCCL Partnership |                                                                                                                                                               |                                                                      |                                                                                   |
| Canadian<br>Fertilizers<br>Industries | Canadian Fertilizers Limited                           | 1- Canadian Fertilizers Limited                                                                                                                               | Fertilizer Manufacturing                                             | 1,637,981                                                                         |
| The Dow Chemical<br>Company           | Dow Chemical Canada ULC                                | 1- Western Canada Operations                                                                                                                                  | Chemical Manufacturing                                               | 1,426,306                                                                         |
| TransCanada<br>Corporation            | Nova Gas Transmission Ltd.                             | 1- TransCanada Pipeline, Alberta System                                                                                                                       | Pipeline Transportation                                              | 1,792,430                                                                         |
|                                       | TransCanada Energy Ltd.                                | 1- MacKay River Power Plant<br>2- Carseland Power Plant<br>3- Redwater Cogeneration Plant                                                                     | Oil Sands In Situ Extraction—Electric<br>Power Generation            | 1,360,432                                                                         |
|                                       |                                                        | 1- Redwater Fertilizer Operations<br>2- Fort Saskatchewan Nitrogen Operations<br>3- Carseland Nitrogen Operations                                             | Fertilizer Manufacturing                                             | 2,341,245                                                                         |
| Agrium<br>Corporation                 | Agrium Inc.                                            |                                                                                                                                                               |                                                                      |                                                                                   |
| Air Products<br>Corporation           | Air Products Canada Ltd.                               | 1- Edmonton Hydrogen Facility                                                                                                                                 | Chemical Manufacturing                                               | 1,010,044                                                                         |

<sup>a</sup> Reporting companies, facilities and sectors are based on the latest published list from Alberta Environment and Sustainable Resource Development for 2011 with reported GHG emissions in CO<sub>2e</sub> [1]; <sup>b</sup> Total emissions are the emissions reported by the facilities (in column 3) related to the same reporting company calculated according to the latest published list from Alberta Environment and Sustainable Resource Development for 2011 with reported GHG emissions in CO<sub>2e</sub> [1].

## Reference

1. Alberta Environment and Sustainable Resource Development (AESRD). *Information Centre, 2011 Facility Table*; AESRD, Government of Alberta: Edmonton, AB, Canada, 2012. Available online: <http://environment.gov.ab.ca/info/posting.asp?assetid=8851&subcategoryid=53> (accessed on 1 September 2014).
