# Supplementary material
Source: MDPI journal article supplement (https://www.mdpi.com/2071-1050/9/2/182)
Supplement: s1 [file s1]

Archive with 2 entries (2 files):
- sustainability-163756-supplementary 2-done.pdf
- Supplementary Material 1_Sustainability.xlsx
