# Supplementary material
Source: MDPI journal article supplement (https://www.mdpi.com/2071-1050/9/2/182)
Supplement: s1 [file s1 › Supplementary Material 1_Sustainability.xlsx]

## Sheet: Complete dataset
Entire Dataset used in the study
Data/Information	Data sources
List of the large GHG emitters (emitting >100,000 tonnes CO2e) in Alberta with reporting companies, facilities, sectors and reported emissions by each facility in CO2e	The latest published list from Alberta Environment and Sustainable Resource Development for 2011 (Please see "list of large emitters" spreadsheet for the list used)
Information regarding the sustainability indicators and additional activities related to the three dimensions of sustainability	Sustainability reports (for 2011) for the corporations (parent companies) (Please see "Sustainability indicators" spreadsheet for the information collected from the sustainability reports of the 16 corporations)
Compliance mechanisms used by facilities in Alberta for 2011	Confidential data

## Sheet: List of large emitters
List of the large GHG emitters from Alberta Environment and Sustainable Resource Development (2011)
Note: The list reported here has been changed from the original one by removing those facilities emitting less than 100 kt CO2e
				CO2	CH4	N2O	HFC	PFC	SF6	Total
	Sector	Facility Name	Reporting Company	(t CO2e)	(t CO2e)	(t CO2e)	(t CO2e)	(t CO2e)	(t CO2e)	(t CO2e)
1	Oil Sands Mining and Upgrading	Mildred Lake and Aurora North Plant Sites	Syncrude Canada Ltd.	1.1745e+07	927854	187377	0	0	0	1.28603e+07
2	Electric Power Generation	Sundance Thermal Electric Power Generating Plant	TransAlta Generation Partnership	1.13857e+07	2585.9	75925	0	0	0	1.14642e+07
3	Electric Power Generation	Genesee Thermal Generating Station	Capital Power Generation Services Inc.	9.33369e+06	2433.39	51023.4	0	0	0	9.38715e+06
4	Oil Sands Mining and Upgrading	Suncor Energy Inc. Oil Sands	Suncor Energy Oil Sands Limited Partnership	8.22932e+06	148290	118361	0	0	0	8.49597e+06
5	Electric Power Generation	Keephills Thermal Electric Power Generating Plant	TransAlta Generation Partnership	7.90474e+06	1751.74	51126.4	0	0	0	7.95762e+06
6	Electric Power Generation	Sheerness Generating Station	Alberta Power (2000) Ltd.	5.55011e+06	1363.61	26547.5	0	0	0	5.57802e+06
7	Electric Power Generation	Battle River Generating Station	Alberta Power (2000) Ltd.	5.12089e+06	1285.61	23817.3	0	0	0	5.146e+06
8	Oil Sands In Situ Extraction	Cold Lake	Imperial Oil Resources	4.55185e+06	12777.3	23564	0	0	0	4.58819e+06
9	Oil Sands In Situ Extraction	Long Lake Project	Nexen Inc.	3.1649e+06	9962.4	14504.9	38.445	0	0	3.18941e+06
10	Oil Sands Mining and Upgrading	Scotford Upgrader and Upgrader Cogeneration	Shell Canada Energy Limited	2.89904e+06	17354.4	18395.7	0	0	0	2.93479e+06
11	Oil Sands In Situ Extraction	Wolf Lake and Primrose Plant	Canadian Natural Resources Limited	2.87863e+06	75936.9	18362.5	0	0	0	2.97293e+06
12	Chemical Manufacturing	NOVA Chemicals Corporation (Joffre)	NOVA Chemicals Corporation	2.87118e+06	7183.43	13894.8	0	0	478	2.89274e+06
13	Oil Sands In Situ Extraction	Foster Creek SAGD Bitumen Battery (with Cogen)	Cenovus FCCL Ltd., as operator for FCCL Partnership	2.03278e+06	2376.72	8097.2	0	0	0	2.04325e+06
14	Oil Sands In Situ Extraction	Firebag	Suncor Energy Oil Sands Limited Partnership	1.98897e+06	1361.28	10723.8	0	0	0	2.00105e+06
15	Fertilizer Manufacturing	Canadian Fertilizers Limited	Canadian Fertilizers Limited	1.63248e+06	363.51	5132.45	0	0	0	1.63798e+06
16	Oil Sands Mining and Upgrading	Horizon Oil Sands Processing Plant and Mine	Canadian Natural Resources Limited	1.50307e+06	141197	6691.28	0	0	172.223	1.65113e+06
17	Petroleum and Coal Products	Strathcona Refinery	Imperial Oil	1.46905e+06	2017.6	8074.91	0	0	0	1.47914e+06
18	Chemical Manufacturing	Western Canada Operations	Dow Chemical Canada ULC	1.41856e+06	1670.75	4308.72	1770.6	0	0	1.42631e+06
19	Pipeline Transportation	TransCanada Pipeline, Alberta System	Nova Gas Transmission Ltd.	1.37717e+06	395127	20129.2	0	0	0	1.79243e+06
20	Petroleum and Coal Products	Edmonton Refinery	Suncor Energy Products Partnership	1.29341e+06	5774.1	7236.52	0	0	0	1.30642e+06
21	Oil Sands Mining and Upgrading	Muskeg River Cogeneration Plant	ATCO Power Canada Ltd.	1.21667e+06	1448.79	7237.61	0	0	0	1.22535e+06
22	Fertilizer Manufacturing	Redwater Fertilizer Operations	Agrium Inc.	1.105e+06	47155.2	32853.3	0	0	0	1.18501e+06
23	Petroleum and Coal Products	Shell Scotford Refinery	Shell Canada Products	1081670	19139.4	2411.8	0	0	0	1.10322e+06
24	Electric Power Generation	H.R.Milner Generating Station	Milner Power Limited Partnership by its GP Milner Power Inc.	1.02998e+06	386.599	4608.46	0	0	0	1.03497e+06
25	Chemical Manufacturing	Edmonton Hydrogen Facility	Air Products Canada Ltd.	1.00891e+06	865.859	265.509	0	0	0	1.01004e+06
26	Mineral Product Manufacturing	Exshaw Cement Plant	Lafarge Canada Inc.	950726	347.023	1158.81	0	0	0	952231
27	Oil Sands Mining and Upgrading	Shell Albian Sands Jackpine Mine	Shell Canada Energy	908729	53260.3	4964.57	0	0	0	966954
28	Oil Sands In Situ Extraction	MacKay River Power Plant	TransCanada Energy Ltd.	843772	1198.33	6633.07	0	0	0	851603
29	Mineral Product Manufacturing	Edmonton Plant	Lehigh Cement, a Division of Lehigh Hanson Materials Ltd.	798908	1068.57	217.465	0	0	0	800194
30	Oil Sands In Situ Extraction	Jackfish 1 SAGD Plant	Devon Canada Corporation	693910	4842.01	1272.92	0	0	0	700025
31	Oil Sands Mining and Upgrading	Shell Albian Sands Muskeg River Mine	Shell Canada Energy	629678	76546.2	4286.5	0	0	0	710511
32	Conventional Oil and Gas Extraction	Caroline Complex	Shell Canada Limited	597060	3905.72	2271.43	0	0	0	603237
33	Fertilizer Manufacturing	Fort Saskatchewan Nitrogen Operations	Agrium Inc.	591766	2268.24	1965.93	0	0	0	596000
34	Oil Sands In Situ Extraction	MEG Christina Lake Cogeneration Facility Phase 2	MEG Energy Corp.	570833	227.014	2988.86	0	0	0	574049
35	Fertilizer Manufacturing	Carseland Nitrogen Operations	Agrium Inc.	535223	22930.5	2084.38	0	0	0	560238
36	Pipeline Transportation	Alliance Pipeline Ltd. - AB Pipeline System	Alliance Pipeline Ltd.	520906	20528.3	3845.36	0	0	0	545280
37	Oil Sands In Situ Extraction	Surmont SAGD Commercial Battery	ConocoPhillips Canada Resources Corp.	467482	615.153	814.742	0	0	0	468912
38	Oil Sands In Situ Extraction	Christina Lake SAGD Bitumen Battery	Cenovus FCCL Ltd., as operator for FCCL Partnership	453229	1331	786.47	0	0	0	455346
39	Conventional Oil and Gas Extraction	Ram River	Husky Oil Operations Limited	448041	3583.25	1296.67	0	0	0	452921
40	Conventional Oil and Gas Extraction	Cochrane Extraction Plant	Inter Pipeline Extraction Ltd.	447233	14390.9	2897.17	0	0	0	464521
41	Chemical Manufacturing	Scotford Complex	Air Liquide Canada Inc.	443603	567.361	3246.11	0	0	0	447417
42	Electric Power Generation	Calgary Energy Centre	Calgary Energy Centre No. 2 Inc.	441320	687.162	3648.39	0	0	0	445656
43	Oil Sands In Situ Extraction	Tucker Thermal	Husky Oil Operations Limited	416669	239.595	752.432	0	0	0	417661
44	Conventional Oil and Gas Extraction	Kaybob South #3 Gas Plant	SemCams ULC	396988	4989.56	1992.21	0	0	0	403970
45	Electric Power Generation	Fort Saskatchewan Thermal Electric(Cogeneration) Power Plant	TransAlta Generation Partnership	371760	569.701	2930.49	0	0	0	375260
46	Conventional Oil and Gas Extraction	Waterton Complex	Shell Canada Limited	353127	6656.06	5427.32	0	0	0	365210
47	Conventional Oil and Gas Extraction	Empress Straddle Gas Plant	Spectra Energy Empress LP	344173	3744.12	1995.84	0	0	0	349913
48	Conventional Oil and Gas Extraction	Harmattan Gas Processing Plant	Taylor Processing Inc.	331023	22702.1	2293.38	0	0	0	356018
49	Electric Power Generation	Electric Utility - Generation	City of Medicine Hat	324263	2608.61	2567.67	0	0	7.17	329446
50	Electric Power Generation	Carseland Power Plant	TransCanada Energy Ltd.	315919	450.003	2498.72	0	0	0	318868
51	Chemical Manufacturing	Scotford Chemical Plant	Shell Chemicals Canada Ltd	313947	191.1	708.66	9204.99	103.96	0	324156
52	Conventional Oil and Gas Extraction	Rimbey Gas Plant	Keyera Corp	309461	5556.83	2229.38	0	0	0	317247
53	Oil Sands In Situ Extraction	Peace River Complex 5-21	Shell Canada Limited	307352	2736.46	1642.91	0	0	0	311731
54	Conventional Oil and Gas Extraction	Strachan Gas Plant	Keyera Corp	299468	8696.3	2571.07	0	0	0	310735
55	Primary Metal Manufacturing	Fort Saskatchewan	Sherritt International Corporation	285980	13619.8	3595.88	0	0	0	303196
56	Electric Power Generation	Rainbow Lake Cogeneration Power Plant (Units 4-5)	ATCO Power Canada Ltd.	272794	408.862	2105.3	0	0	0	275308
57	Conventional Oil and Gas Extraction	Hanlan Robb Gas Plant	Suncor Energy Oil and Gas Partnership	264127	17066.4	585.652	0	0	0	281779
58	Oil Sands In Situ Extraction	Leismer SAGD Bitumen Battery	Statoil Canada Ltd.	260045	245.238	541.57	0	0	0	260832
59	Oil Sands In Situ Extraction	Hangingstone SAGD Demonstration Facility	Japan Canada Oil Sands Limited	254428	933.082	382.726	0	0	0	255743
60	Pipeline Transportation	Foothills Pipeline, Alberta	Foothills Pipe Lines Ltd.	246760	11395.6	3311.08	0	0	0	261467
61	Oil Sands In Situ Extraction	Algar	Connacher Oil and Gas Limited	245008	3436.45	1199.36	0	0	0	249644
62	Chemical Manufacturing	Alberta Envirofuels	Alberta Envirofuels	239254	146.502	440.2	0	0	0	239840
63	Conventional Oil and Gas Extraction	Kaybob Amalgamated Sour Gas Plant	SemCams ULC	236101	11752.5	3143.83	0	0	0	250997
64	Conventional Oil and Gas Extraction	Jumping Pound Complex	Shell Canada Limited	229079	4438.78	649.202	0	0	0	234167
65	Chemical Manufacturing	Methanex Medicine Hat Methanol Plant	Methanex Corporation	225619	3135.47	35487	0	0	0	264242
66	Conventional Oil and Gas Extraction	Edson Gas Plant	Talisman Energy	222934	6277.69	1502.26	0	0	0	230714
67	Oil Sands In Situ Extraction	Pod One	Connacher Oil and Gas Limited	221018	3119.98	1150.69	0	0	0	225288
68	Electric Power Generation	Heating Plant	University of Alberta Heating Plant	216228	80.9403	119.474	0	0	0	216429
69	Electric Power Generation	Balzac Power Station	Nexen Inc.	196160	785.4	1562.4	0	0	0	198508
70	Conventional Oil and Gas Extraction	Elmworth Gas Plant	ConocoPhillips Canada (BRC) Partnership	195271	9877.22	1795.21	0	0	0	206943
71	Electric Power Generation	Cavalier Power Plant	EnCana Corporation	195208	398.58	1531.4	0	0	0	197138
72	Electric Power Generation	Clover Bar Energy Centre	Capital Power (Alberta) Limited Partnership	193825	1039.86	1535.03	0	0	0	196400
73	Electric Power Generation	Redwater Cogeneration Plant	TransCanada Energy Ltd.	188286	250.845	1424.02	0	0	0	189961
74	Conventional Oil and Gas Extraction	Shell Burnt Timber Gas Plant	Shell Canada Limited	183679	684.489	290.625	0	0	0	184654
75	Oil Sands In Situ Extraction	MEG Christina Lake Regional Project	MEG Energy Corp.	182845	947.917	956.133	0	0	0	184749
76	Oil Sands In Situ Extraction	Jackfish 2 SAGD Plant	Devon Canada Corporation	165719	5294.56	316.107	0	0	0	171330
77	Oil Sands In Situ Extraction	Orion Complex	Shell Canada Limited	159478	319.444	865.489	0	0	0	160663
78	Mineral Product Manufacturing	Exshaw Plant	Graymont Western Canada Inc.	141955	86.016	258.54	0	0	0	142300
79	Coal Mining	Coal Valley Mine	Coal Valley Resources Inc.	140717	37740.1	1932.34	0	0	0	180389
80	Chemical Manufacturing	Joffre LAO Plant	INEOS Canada Partnership	137742	85.6212	1037.07	0	0	0	138864
81	Chemical Manufacturing	Cancarb Ltd.	Cancarb Ltd.	136796	274.892	371.225	0	0	5.2102	137448
82	Chemical Manufacturing	Prentiss Chemical Manufacturing Facility	MEGlobal Canada Inc.	136683	544.816	205.561	0	0	0	137433
83	Wood Product Manufacturing	Hinton Pulp	West Fraser Mills Ltd.	134448	972.51	10225.4	0	0	0	145646
84	Coal Mining	Grande Cache Coal Corporation	Grande Cache Coal Corporation	134072	150.213	1355.94	0	0	0	135578
85	Conventional Oil and Gas Extraction	Quirk Creek Gas Plant	Imperial Oil Resources	124992	6316.34	886.241	0	0	0	132195
86	Mineral Product Manufacturing	Baymag Exshaw Operations	Baymag Inc.	124917	12.485	190.87	0	0	0	125120
87	Conventional Oil and Gas Extraction	Wapiti Gas Plant	Devon Canada Corporation	119562	5393.84	1356.37	0	0	0	126313
88	Conventional Oil and Gas Extraction	Wildcat Hills Gas Plant	Direct Energy Marketing Ltd.	115804	4011.31	1983.91	0	0	0	121799
89	Electric Power Generation	Northern Prairie Thermal Electric Power Plant	Constellation Energy	114360	82.4054	580.134	0	0	0	115022
90	Electric Power Generation	Crossfield Energy Centre	Enmax Green Power Inc.	113170	183.078	21.08	0	0	0	113374
91	Conventional Oil and Gas Extraction	Olds Gas Plant	Pengrowth Energy Corporation	112938	2385.69	1980.43	0	0	0	117305
92	Oil Sands In Situ Extraction	MacKay River, In-Situ Oil Sands Plant	Suncor Energy Oil Sands Limited Partnership	108879	499.479	656.456	0	0	0	110034
93	Conventional Oil and Gas Extraction	East Crossfield Gas Plant 9-14-28-1W5	TAQA NORTH Ltd.	103567	2016.12	449.624	0	0	0	106032
94	Wood Product Manufacturing	Alberta-Pacific Forest Industries Inc.	Alberta-Pacific Forest Industries Inc.	99316.7	1816.48	18893.3	0	0	0	120026
95	Coal Mining	Cheviot Mine (Cardinal River Operations)	Teck Coal Limited	96688	18780.1	9464.36	0	0	0	124932
96	Wood Product Manufacturing	Grande Prairie Operations	Weyerhaeuser Company Limited	95765.5	21627.9	10098.7	0	0	0	127492
97	Conventional Oil and Gas Extraction	Nevis Gas Plant	Keyera Corp	94957.5	11599.9	3621.54	0	0	0	110179
98	Coal Mining	Highvale Coal Mine	TransAlta Generation Partnership	90548.6	116420	902.937	0	0	0	207871
99	Conventional Oil and Gas Extraction	Brazeau Gas Plant	Blaze Energy Ltd.	84092.5	48409.2	1614.65	0	0	0	134116
100	Wood Product Manufacturing	Peace River Pulp Division	Daishowa-Marubeni International Ltd-Peace River Pulp	75081.8	20598.3	9366.96	0	0	0	105047
101	Pipeline Transportation	ATCO Pipelines	ATCO Gas and Pipelines Ltd.	53713.4	100643	3769.2	0	0	0	158126
102	Natural Gas Distribution	ATCO Gas - Distribution Systems	ATCO Gas and Pipelines Ltd.	10694.8	134901	61.535	0	0	0	145658
103	Fertilizer Manufacturing	Carseland Works	Orica Canada Inc.	458.273	8.8305	377482	0	0	0	377949

## Sheet: Sustainability indicators
Sustainability indicators related to the three sustainability dimensions for the 16 corporations
Corporation (Parent Company)	GHG emissions (tonnes CO2e) (2011)	Revenue (000) (2011)	Number of employees (2011)	CSR
				GRI	DJSI	GCUN
Syncrude Canada Ltd.	11236000	7000000	5500	X
TransAlta corporation	27818400	2663000	2772	X	X
Capital Power corporation	11919000	1691000	939	X
Suncor Energy Inc. Corporation	18739000	39337000	13932	X	X	X
ATCO Group Corporation	15217000	3991000	8891	X
Imperial Oil Limited Corporation	10300000	30474000	5083	X
Nexen	5820000	6464000	3067	X	X	X
Royal Dutch Shell Plc	74000000	470171000	90000	X	X	X
Canadian Natural Resources	14840000	13792000	5970	X
Nova Chemicals	4363000	5241000	2500
Cenovus Energy	4025530	15696000	3248	X	X
Canadian Fertilizers Industries	15000000	6097900	2400
The Dow Chemical Company	28000000	59785000	53000	X	X	X
TransCanada Corporation	11449190	7839000	4400		X
Agrium Corporation	3440000	15470000	14800	X		X
Air Products Corporation	14440000	10082000	18900	X	X
"X": means met the indicator
"-": means doesn't meet the indicator
